# Supplementary material for: Transcriptome Analysis of Hamelia patens (Rubiaceae) Anthers Reveals Candidate Genes for Tapetum and Pollen Wall Development
Source: PubMed Central journal article supplement (PMC5220384; doi:10.3389/fpls.2016.01991), 2017-01-06
Supplement: Data_Sheet_1.pdf [file Data_Sheet_1.pdf]

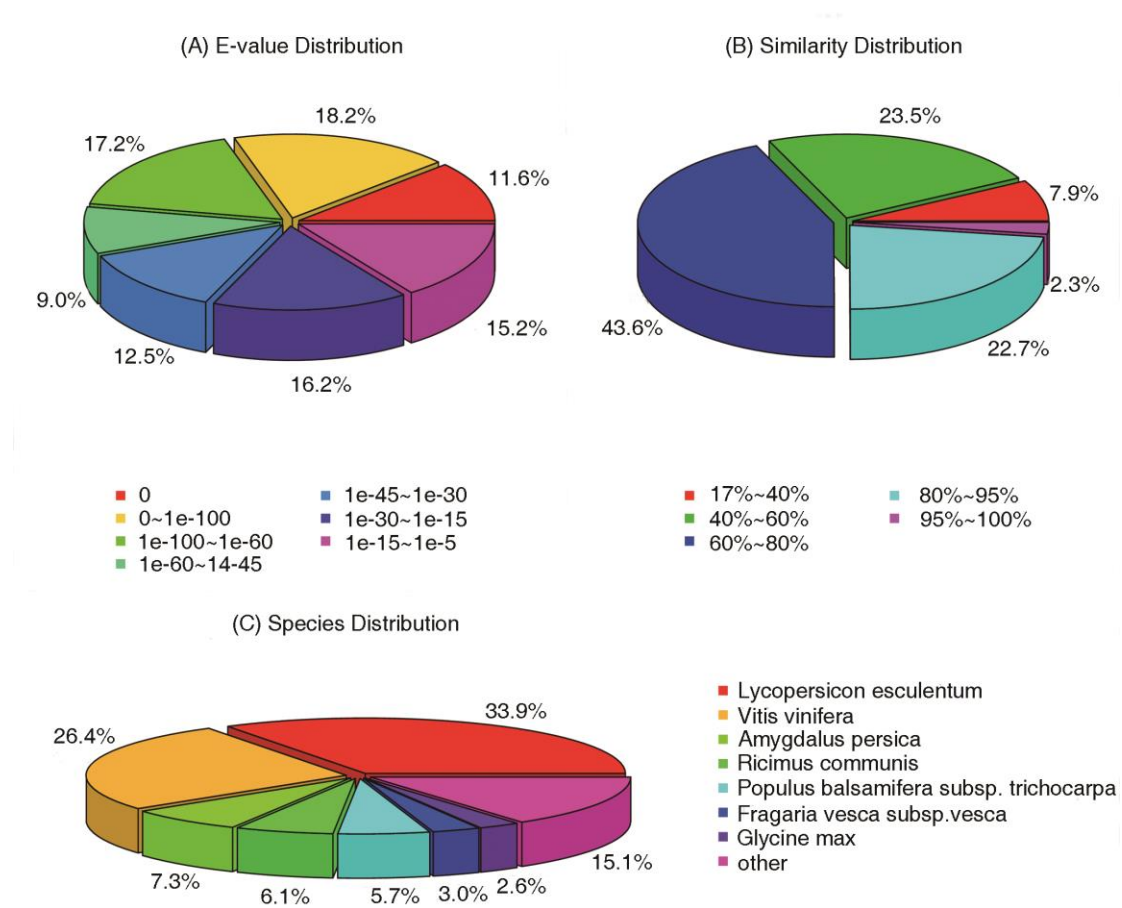

**Supplementary Fig. S1** Result of NR Annotation.

(A) The E-value distribution of the result of NR annotation. (B) The similarity distribution of the result of NR annotation. (C) The species distribution of the result of NR annotation.

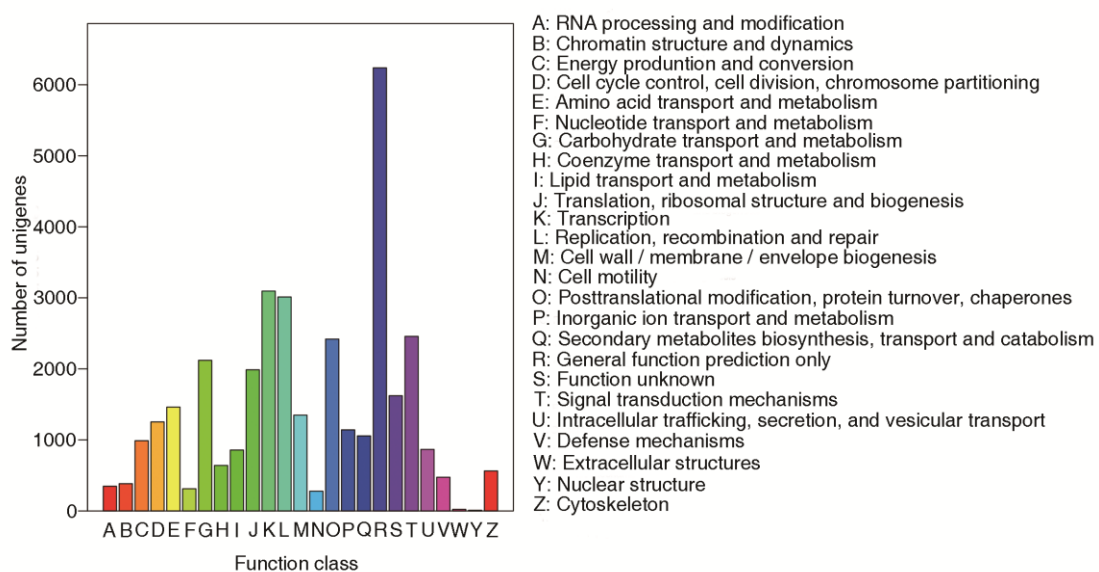

**Supplementary Fig. S2** COG Function classification of *H. patens* unigenes.

The horizontal coordinates are function classes of COG and the vertical coordinates the numbers of unigenes in each class. The full names of the function classes are listed to the right.

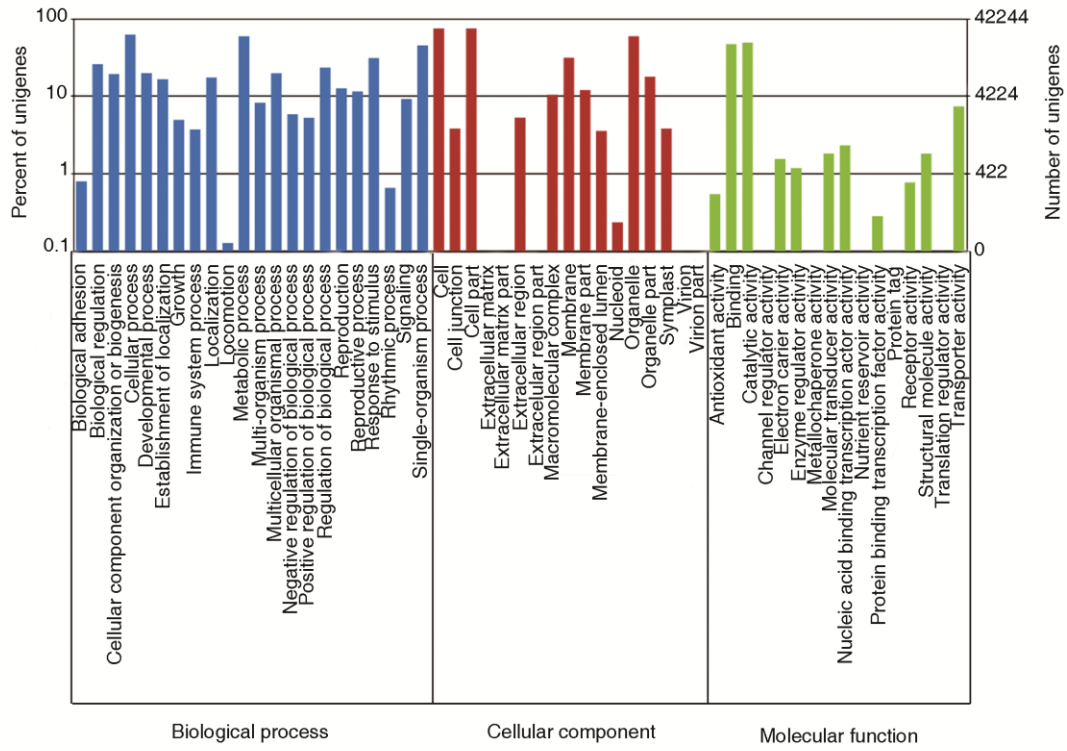

**Supplementary Fig. S3** GO Classification of *H. patens* unigenes.

The X-axis shows the GO function classes. The right Y-axis shows the numbers of unigenes in one class and the left Y-axis the percentages of unigenes in each class.

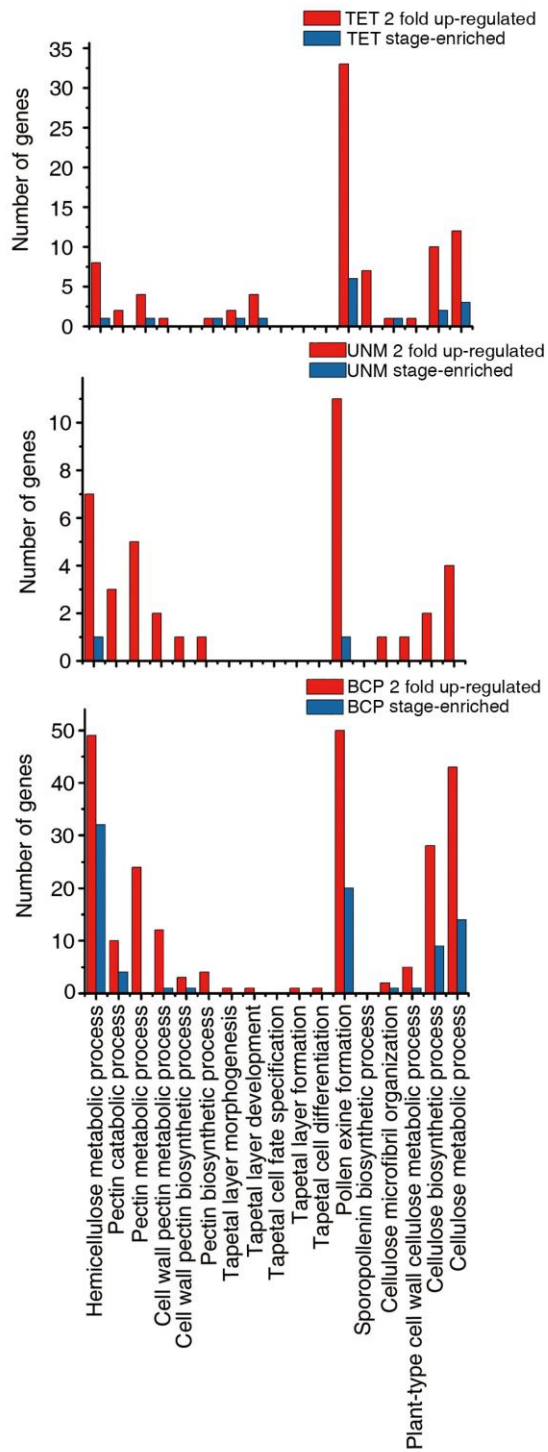

**Supplementary Fig. S4** GO enrichment analysis of 2-fold up-regulated and specifically-enriched genes.

The bar graph highlighting the distribution of the up-regulated and enriched genes at individual stages

into functional categories based on GO annotations.

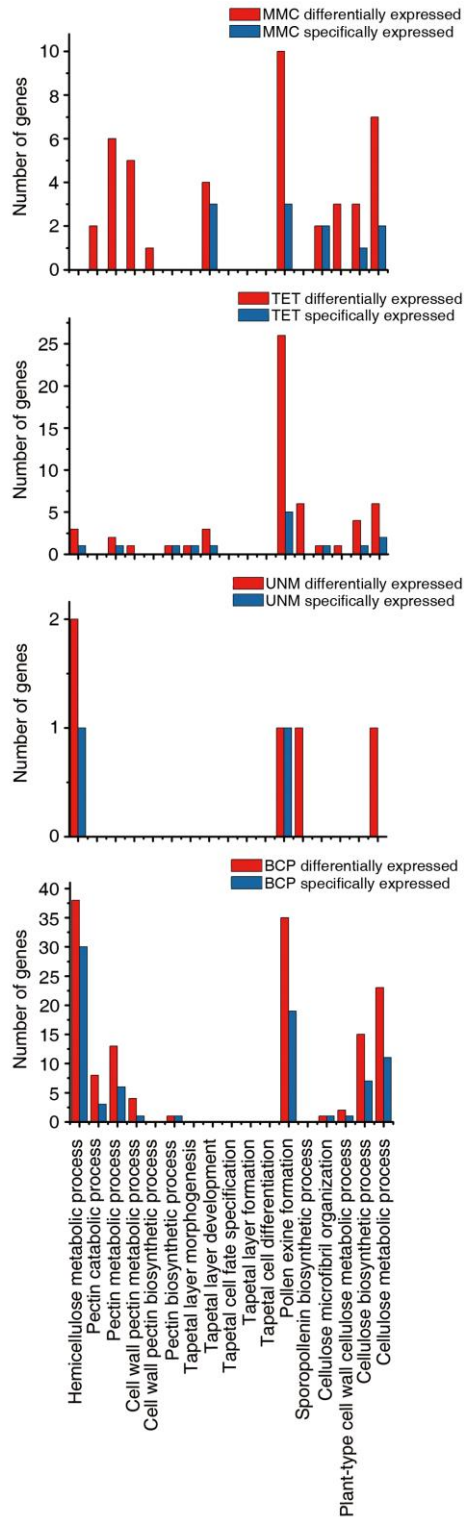

**Supplementary Fig. S5** GO enrichment analysis of differentially expressed and stage-specifically expressed genes.

The bar graph highlighting the distribution of the differentially expressed and stage-specifically expressed genes at individual stages into functional categories based on GO annotations.

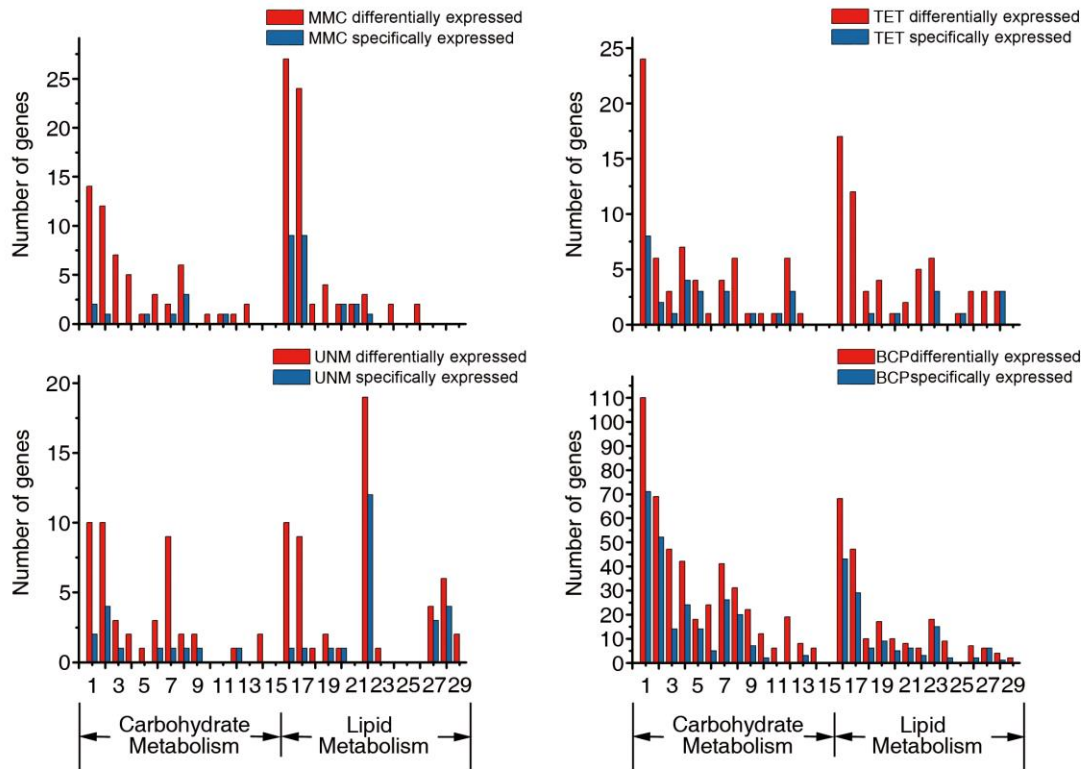

1. Starch and sucrose metabolism
2. Pentose and glucuronate interconversions
3. Glycolysis / Gluconeogenesis
4. Amino sugar and nucleotide sugar metabolism
5. Inositol phosphate metabolism
6. Pyruvate metabolism
7. Galactose metabolism
8. Ascorbate and aldarate metabolism
9. Fructose and mannose metabolism
10. Pentose phosphate pathway
11. Glyoxylate and dicarboxylate metabolism
12. Citrate cycle (TCA cycle)
13. Propanoate metabolism
14. Butanoate metabolism
15. C5-Branched dibasic acid metabolism

16. Glycerophospholipid metabolism
17. Ether lipid metabolism
18. Fatty acid metabolism
19. Glycerolipid metabolism
20. alpha-Linolenic acid metabolism
21. Steroid biosynthesis
22. Cutin, suberine and wax biosynthesis
23. Sphingolipid metabolism
24. Fatty acid biosynthesis
25. Arachidonic acid metabolism
26. Biosynthesis of unsaturated fatty acids
27. Fatty acid elongation
28. Linoleic acid metabolism
29. Synthesis and degradation of ketone bodies

**Supplementary Fig. S6** KEGG pathway enrichment analysis of differentially expressed and stage-specifically expressed genes.

The bar graph highlighting the distribution of the differentially expressed and stage-specifically expressed genes at individual stages into pathway categories based on KEGG pathway annotations.
